# Supplementary material
Source: publisher figshare collection journal article supplement (https://acs.figshare.com/ndownloader/files/4379425)
Supplement: Supplementary file 1 [file 4379425]

**Rediscovering Silicones. Molecularly Smooth, Low Surface Energy,  
Unfilled, UV/vis-Transparent, Extremely Crosslinked,  
Thermally Stable, Hard and Elastic PDMS**

Peiwen Zheng and Thomas J. McCarthy \*

*Solid-State NMR:*  $^{13}\text{C}$  and  $^{29}\text{Si}$  spectra were recorded using a Bruker DSX300 spectrometer.  $\text{D}_4^{\text{H}}\text{-D}_4^{\text{V}}\text{-1-1}$ :  $^{13}\text{C}$  NMR (75 MHz) -0.312 ( $\text{CH}_3$ ), 8.899 ( $\text{CH}_2$ ), 137.378 ( $\text{CH}=\text{CH}_2$ );  $^{29}\text{Si}$  NMR (59 MHz) -35.770 ( $\text{Si-C-C}$ ,  $\text{Si-C}=\text{C}$ , and  $\text{Si-C}$ ), -21.326 ( $\text{Si-C-C-Si}$ ).  $\text{D}_4^{\text{H}}\text{-D}_4^{\text{V}}\text{-2-1}$ :  $^{13}\text{C}$  NMR (75 MHz) -1.087 ( $\text{CH}_3$ ), 8.341 ( $\text{CH}_2$ );  $^{29}\text{Si}$  NMR (59 MHz) -36.231 ( $\text{Si-C-C}$  and  $\text{Si-C}$ ), -21.134 ( $\text{Si-C-C-Si}$ ).

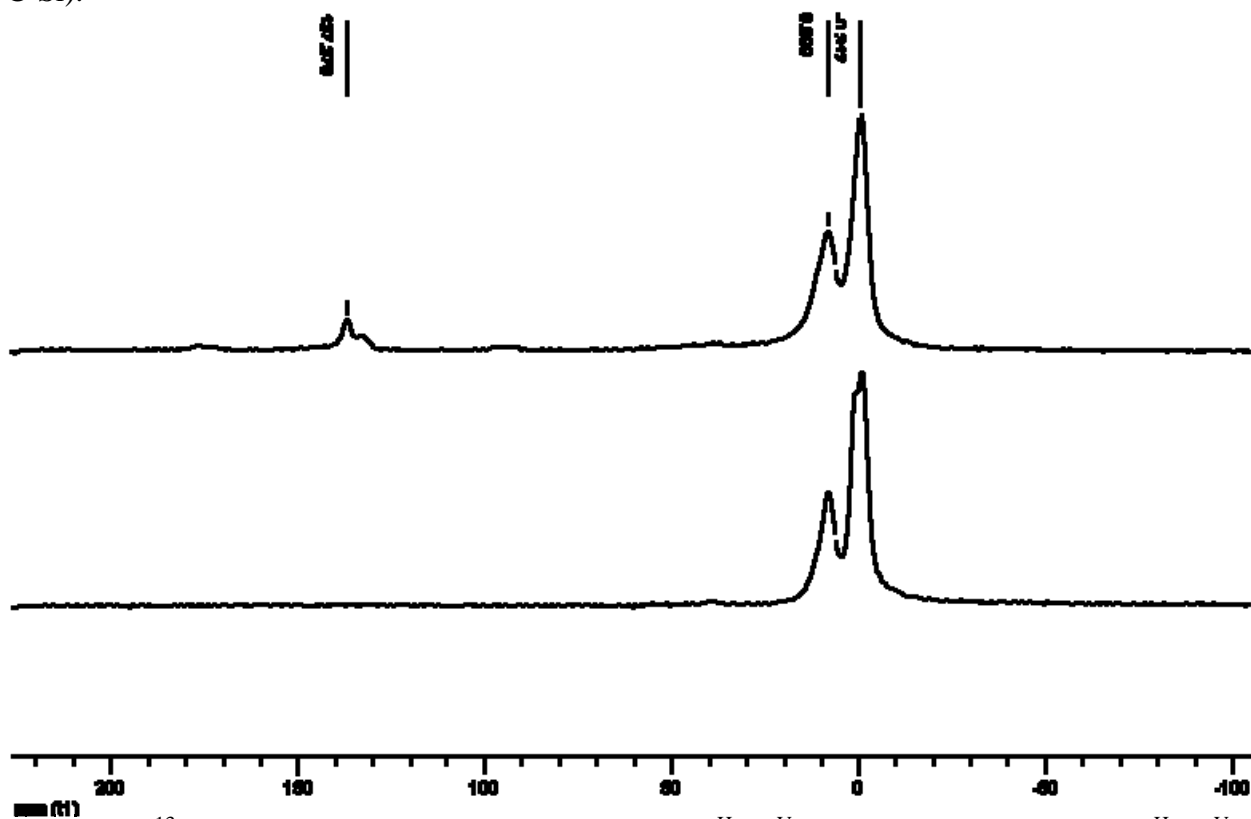

**Figure S1.**  $^{13}\text{C}$  NMR (75 MHz) spectra of silicones:  $\text{D}_4^{\text{H}}\text{-D}_4^{\text{V}}$  1:1 molar ratio (top) and  $\text{D}_4^{\text{H}}\text{-D}_4^{\text{V}}$  2:1 molar ratio (bottom).

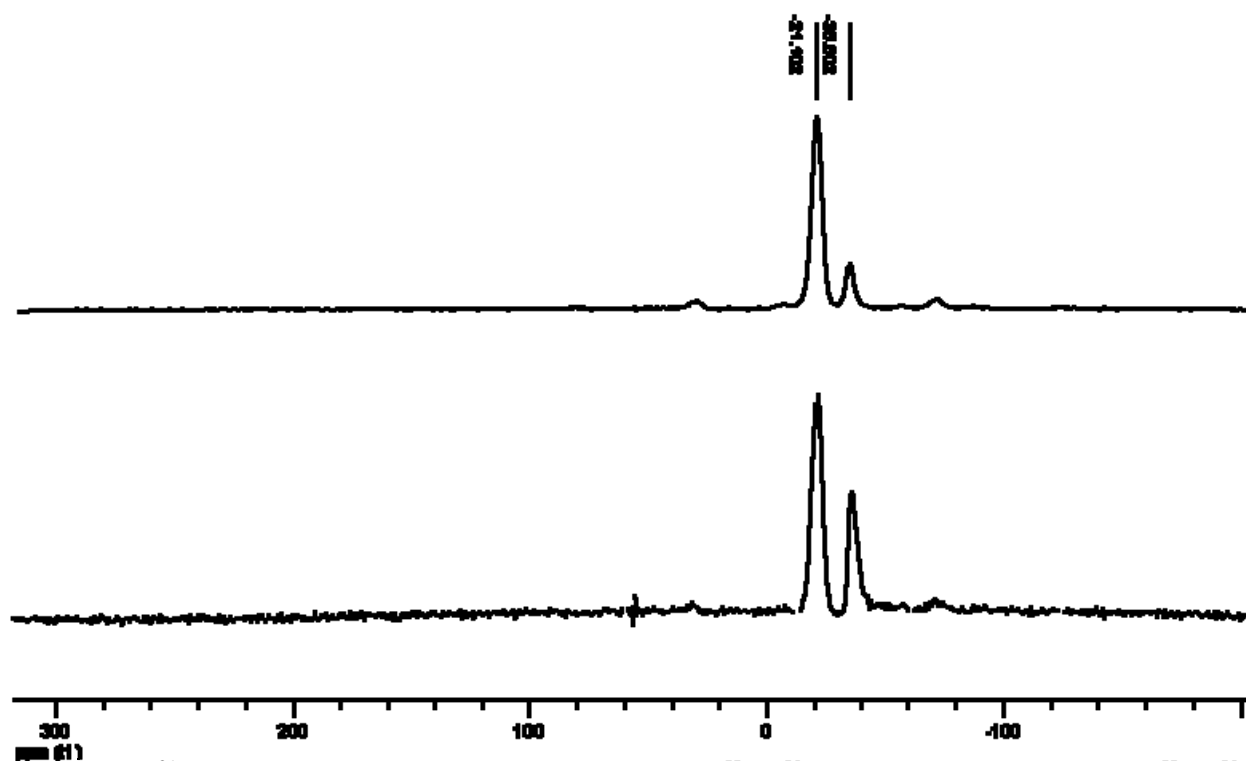

**Figure S2.**  $^{29}\text{Si}$  NMR (59 MHz) spectra of silicones:  $\text{D}_4^{\text{H}}\text{-D}_4^{\text{V}}$  1:1 molar ratio (top) and  $\text{D}_4^{\text{H}}\text{-D}_4^{\text{V}}$  2:1 molar ratio (bottom).

*Differential Scanning Calorimetry:* A TA DSC Q200 was used. The sample was heated to 150 °C and then cooled to -150 °C and finally heated again to 150 °C (10 °C/min heating and cooling).

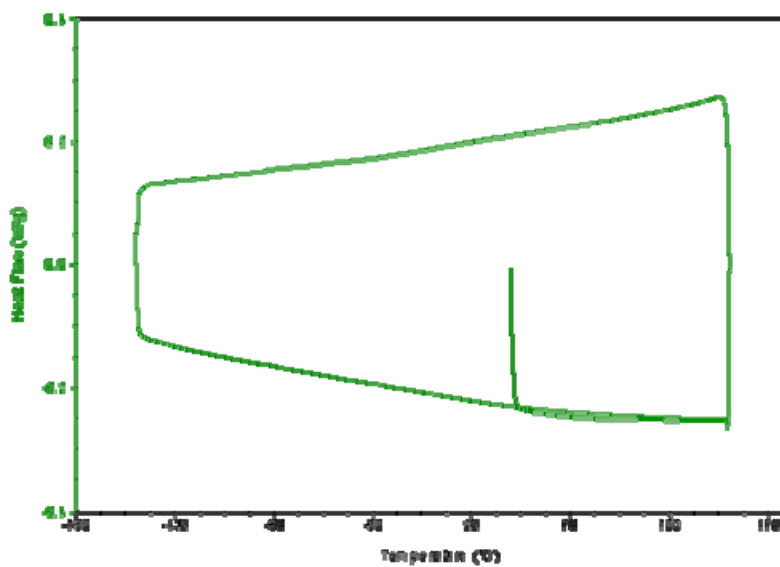

**Figure S3.** DSC data for  $\text{D}_4^{\text{H}}\text{-D}_4^{\text{V}}$  (2:1 molar ratio).

*Attenuated total reflection infrared (ATR-IR) spectroscopy:* An ATR-IR spectrum of  $D_4^H$ - $D_4^V$  2:1 molar ratio was recorded using a Perkin Elmer 100 FT-IR spectrometer. Assignments: 2884-2960  $\text{cm}^{-1}$ ,  $\text{CH}_3$  stretching; 2158  $\text{cm}^{-1}$ , Si-H stretching; 1408  $\text{cm}^{-1}$ ,  $\text{CH}_2$  deformation; 1260  $\text{cm}^{-1}$ , Si- $\text{CH}_3$  stretching; 1026  $\text{cm}^{-1}$ , Si-O stretching; 908  $\text{cm}^{-1}$ , Si-H bending; 756  $\text{cm}^{-1}$ ,  $\text{CH}_3$  rocking and Si-C stretching.

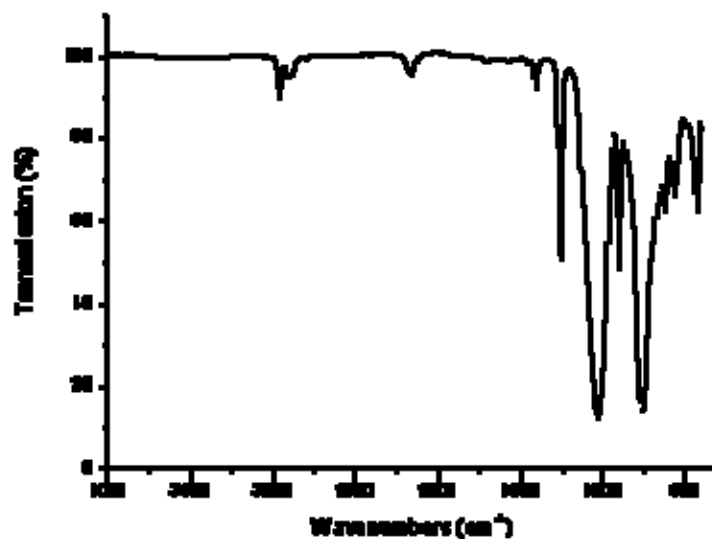

**Figure S4.** Infrared spectrum of  $D_4^H$ - $D_4^V$  (2:1 molar ratio).
